# Supplementary material for: The effects of different sowing methods on the yield and quality of cereal species in forage production
Source: PeerJ. 2026 Jan 20;14:e20640. doi: 10.7717/peerj.20640 (PMC12829460; doi:10.7717/peerj.20640)
Supplement: Supplemental Information 1 — Data are the averages taken from the randomized block design with three replications. This includes the data and averages for the years 2019-2020, 2020-2021 and average of years. [file peerj-14-20640-s001.xlsx]

## Sheet: 2019-2020
	Species	Sowing Method	Dry Matter Yield (kg/da)	Crude Protein Ratio (%)	Acid Detergent Fiber (%)	Neutral Detergent Fiber (%)	Digestible Dry Matter Ratio (%)	Relative Feed Value
	Barley	Straight Rows	412.645	14.5647	25.3866	43.9691	69.1239	146.242
	Barley	Straight Rows	412.915	13.8889	29.5778	49.963	65.8589	122.619
	Barley	Straight Rows	421.113	14.8258	28.3452	54.6627	66.8191	113.71
	Wheat	Straight Rows	444.114	12.5112	30.8202	50.9327	64.891	118.517
	Wheat	Straight Rows	473.32	11.8071	34.5739	52.0714	61.9669	110.701
	Wheat	Straight Rows	441.97	12.0725	33.0104	47.997	63.1849	122.459
	Rye	Straight Rows	633.405	8.47704	40.2015	63.4392	57.5831	84.4362
	Rye	Straight Rows	892.8	8.88059	37.4189	60.4213	59.7507	91.9908
	Rye	Straight Rows	788.475	9.28415	40.6488	63.3757	57.2346	84.0093
	Triticale	Straight Rows	567.72	13.07	30.4098	48.0088	65.2107	126.354
	Triticale	Straight Rows	543.37	14.45	29.9655	48.5421	65.5569	125.629
	Triticale	Straight Rows	576.999	13.88	30.338	47.9195	65.2667	126.698
	Barley	Perpendicular Rows	564.676	13.997	32.0433	51.6298	63.9383	115.2
	Barley	Perpendicular Rows	537.791	13.4998	29.036	49.2206	66.281	125.266
	Barley	Perpendicular Rows	493.675	13.1415	28.0221	49.0102	67.0708	127.303
	Wheat	Perpendicular Rows	495.254	12.5792	32.7576	52.0943	63.3819	113.179
	Wheat	Perpendicular Rows	472.439	11.8675	32.7806	53.7597	63.3639	109.642
	Wheat	Perpendicular Rows	492.055	12.0055	33.3416	50.6537	62.9269	115.562
	Rye	Perpendicular Rows	652.398	8.32	41.7603	63.7018	56.3687	82.3148
	Rye	Perpendicular Rows	658.472	8.74938	42.7306	65.8384	55.6129	78.5755
	Rye	Perpendicular Rows	779.365	8.88327	40.972	64.5936	56.9828	82.0627
	Triticale	Perpendicular Rows	592.611	12.3073	27.1055	49.2274	67.7849	128.091
	Triticale	Perpendicular Rows	699.6	12.419	29	47	66.309	131.24
	Triticale	Perpendicular Rows	627.12	12.5307	28.22	49.5	66.9166	125.754

## Sheet: 2020-2021
	Species	Sowing Method	Dry Matter Yield (kg/da)	Crude Protein Ratio (%)	Acid Detergent Fiber (%)	Neutral Detergent Fiber (%)	Digestible Dry Matter Ratio (%)	Relative Feed Value
	Barley	Straight Rows	445.676	11.9	23.7	43.6125	70.4377	150.24
	Barley	Straight Rows	479.956	10.99	23.5	43	70.5935	152.717
	Barley	Straight Rows	416.898	12.52	24.0413	43.0585	70.1718	151.599
	Wheat	Straight Rows	407.152	10	36.2699	53.0041	60.6458	106.435
	Wheat	Straight Rows	442.314	11.1	35.99	54.1274	60.8638	104.6
	Wheat	Straight Rows	388.079	10.405	35.5	53.0877	61.2455	107.318
	Rye	Straight Rows	737.13	8.66	31.7	50.2005	64.2057	118.975
	Rye	Straight Rows	749.365	8.7	32.8	51.2066	63.3488	115.081
	Rye	Straight Rows	742.321	9	33.5	49.55	62.8035	117.905
	Triticale	Straight Rows	551.723	9.26	27.33	45.6987	67.6099	137.625
	Triticale	Straight Rows	502.041	10.2112	28.03	46.578	67.0646	133.938
	Triticale	Straight Rows	563.673	9.99	28.677	45.496	66.5606	136.093
	Barley	Perpendicular Rows	526.32	11.77	24.7	40.84	69.6587	158.665
	Barley	Perpendicular Rows	557.708	11.25	25.55	40.6587	68.9965	157.858
	Barley	Perpendicular Rows	550.372	12.3	23.71	41.0235	70.4299	159.704
	Wheat	Perpendicular Rows	436.772	10.54	33.3111	53.0213	62.9506	110.444
	Wheat	Perpendicular Rows	533.465	10.2543	33.0045	53.47	63.1895	109.933
	Wheat	Perpendicular Rows	541.157	10.0011	33.1	53.175	63.1151	110.412
	Rye	Perpendicular Rows	750.857	9.04033	36.254	52.33	60.6581	107.828
	Rye	Perpendicular Rows	713.96	9.59	37.211	50.11	59.9126	111.221
	Rye	Perpendicular Rows	791.686	10.0001	36.99	51	60.0848	109.594
	Triticale	Perpendicular Rows	722.066	10.8	28.58	46.23	66.6362	134.084
	Triticale	Perpendicular Rows	695.58	10.7	28.0015	45.8	67.0868	136.258
	Triticale	Perpendicular Rows	712.457	11.0226	28.77	46.654	66.4882	132.571

## Sheet: Year aggregation for average
2019-2020	Species	Sowing Method	Dry Matter Yield (kg/da)	Crude Protein Ratio (%)	Acid Detergent Fiber (%)	Neutral Detergent Fiber (%)	Digestible Dry Matter Ratio (%)	Relative Feed Value
2019-2021	Barley	Straight Rows	412.645	14.5647	25.3866	43.9691	69.1239	146.242
2019-2022	Barley	Straight Rows	412.915	13.8889	29.5778	49.963	65.8589	122.619
2019-2023	Barley	Straight Rows	421.113	14.8258	28.3452	54.6627	66.8191	113.71
2019-2024	Wheat	Straight Rows	444.114	12.5112	30.8202	50.9327	64.891	118.517
2019-2025	Wheat	Straight Rows	473.32	11.8071	34.5739	52.0714	61.9669	110.701
2019-2026	Wheat	Straight Rows	441.97	12.0725	33.0104	47.997	63.1849	122.459
2019-2027	Rye	Straight Rows	633.405	8.47704	40.2015	63.4392	57.5831	84.4362
2019-2028	Rye	Straight Rows	892.8	8.88059	37.4189	60.4213	59.7507	91.9908
2019-2029	Rye	Straight Rows	788.475	9.28415	40.6488	63.3757	57.2346	84.0093
2019-2030	Triticale	Straight Rows	567.72	13.07	30.4098	48.0088	65.2107	126.354
2019-2031	Triticale	Straight Rows	543.37	14.45	29.9655	48.5421	65.5569	125.629
2019-2032	Triticale	Straight Rows	576.999	13.88	30.338	47.9195	65.2667	126.698
2019-2033	Barley	Perpendicular Rows	564.676	13.997	32.0433	51.6298	63.9383	115.2
2019-2034	Barley	Perpendicular Rows	537.791	13.4998	29.036	49.2206	66.281	125.266
2019-2035	Barley	Perpendicular Rows	493.675	13.1415	28.0221	49.0102	67.0708	127.303
2019-2036	Wheat	Perpendicular Rows	495.254	12.5792	32.7576	52.0943	63.3819	113.179
2019-2037	Wheat	Perpendicular Rows	472.439	11.8675	32.7806	53.7597	63.3639	109.642
2019-2038	Wheat	Perpendicular Rows	492.055	12.0055	33.3416	50.6537	62.9269	115.562
2019-2039	Rye	Perpendicular Rows	652.398	8.32	41.7603	63.7018	56.3687	82.3148
2019-2040	Rye	Perpendicular Rows	658.472	8.74938	42.7306	65.8384	55.6129	78.5755
2019-2041	Rye	Perpendicular Rows	779.365	8.88327	40.972	64.5936	56.9828	82.0627
2019-2042	Triticale	Perpendicular Rows	592.611	12.3073	27.1055	49.2274	67.7849	128.091
2019-2043	Triticale	Perpendicular Rows	699.6	12.419	29	47	66.309	131.24
2019-2044	Triticale	Perpendicular Rows	627.12	12.5307	28.22	49.5	66.9166	125.754
2020-2021	Species	Sowing Method	Dry Matter Yield (kg/da)	Crude Protein Ratio (%)	Acid Detergent Fiber (%)	Neutral Detergent Fiber (%)	Digestible Dry Matter Ratio (%)	Relative Feed Value
2020-2022	Barley	Straight Rows	445.676	11.9	23.7	43.6125	70.4377	150.24
2020-2023	Barley	Straight Rows	479.956	10.99	23.5	43	70.5935	152.717
2020-2024	Barley	Straight Rows	416.898	12.52	24.0413	43.0585	70.1718	151.599
2020-2025	Wheat	Straight Rows	407.152	10	36.2699	53.0041	60.6458	106.435
2020-2026	Wheat	Straight Rows	442.314	11.1	35.99	54.1274	60.8638	104.6
2020-2027	Wheat	Straight Rows	388.079	10.405	35.5	53.0877	61.2455	107.318
2020-2028	Rye	Straight Rows	737.13	8.66	31.7	50.2005	64.2057	118.975
2020-2029	Rye	Straight Rows	749.365	8.7	32.8	51.2066	63.3488	115.081
2020-2030	Rye	Straight Rows	742.321	9	33.5	49.55	62.8035	117.905
2020-2031	Triticale	Straight Rows	551.723	9.26	27.33	45.6987	67.6099	137.625
2020-2032	Triticale	Straight Rows	502.041	10.2112	28.03	46.578	67.0646	133.938
2020-2033	Triticale	Straight Rows	563.673	9.99	28.677	45.496	66.5606	136.093
2020-2034	Barley	Perpendicular Rows	526.32	11.77	24.7	40.84	69.6587	158.665
2020-2035	Barley	Perpendicular Rows	557.708	11.25	25.55	40.6587	68.9965	157.858
2020-2036	Barley	Perpendicular Rows	550.372	12.3	23.71	41.0235	70.4299	159.704
2020-2037	Wheat	Perpendicular Rows	436.772	10.54	33.3111	53.0213	62.9506	110.444
2020-2038	Wheat	Perpendicular Rows	533.465	10.2543	33.0045	53.47	63.1895	109.933
2020-2039	Wheat	Perpendicular Rows	541.157	10.0011	33.1	53.175	63.1151	110.412
2020-2040	Rye	Perpendicular Rows	750.857	9.04033	36.254	52.33	60.6581	107.828
2020-2041	Rye	Perpendicular Rows	713.96	9.59	37.211	50.11	59.9126	111.221
2020-2042	Rye	Perpendicular Rows	791.686	10.0001	36.99	51	60.0848	109.594
2020-2043	Triticale	Perpendicular Rows	722.066	10.8	28.58	46.23	66.6362	134.084
2020-2044	Triticale	Perpendicular Rows	695.58	10.7	28.0015	45.8	67.0868	136.258
2020-2045	Triticale	Perpendicular Rows	712.457	11.0226	28.77	46.654	66.4882	132.571
